# Supplementary material
Source: Research Square preprint supplement (doi:10.21203/rs.3.rs-9644522/v1)
Supplement: Supplementary file 1 [file 78cfb06d2a0d195849fba46a.docx]

The first line shows patients on HD by default, and the second line shows patients on HD by choice.

Table 2: Questionnaire on personal preferences of HD patient

Table 3 : Questionnaire on personal preferences of PD patients
